# Supplementary material
Source: PubMed Central journal article supplement (PMC7539233)
Supplement: NIHMS1607792-supplement-1.pdf [file NIHMS1607792-supplement-1.pdf]

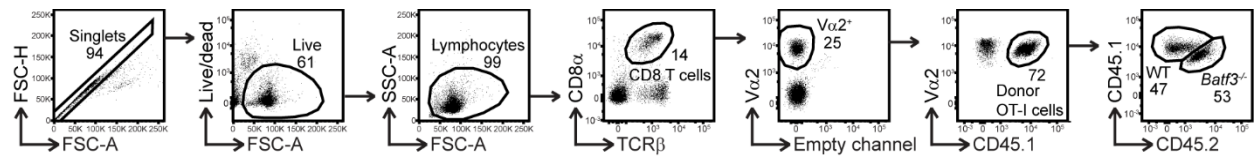

**Supplemental Figure 1.** The gating strategy for donor OT-I cells.

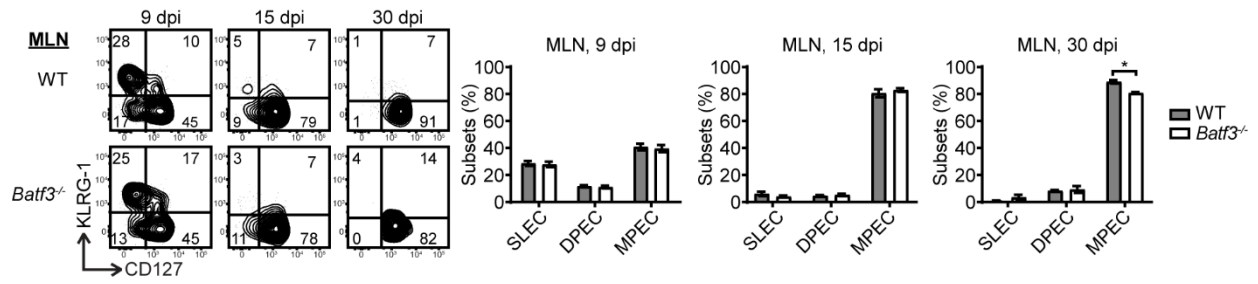

**Supplemental Figure 2.** The kinetics of CD127 and KLRG-1 expression by WT and *Batf3*<sup>-/-</sup> OT-I cells in the MLN. The data are pooled from 3 independent experiments for 9 dpi with n=12 and 2 independent experiments for 15 and 30 dpi with n=7. The data are shown as mean ± SEM.

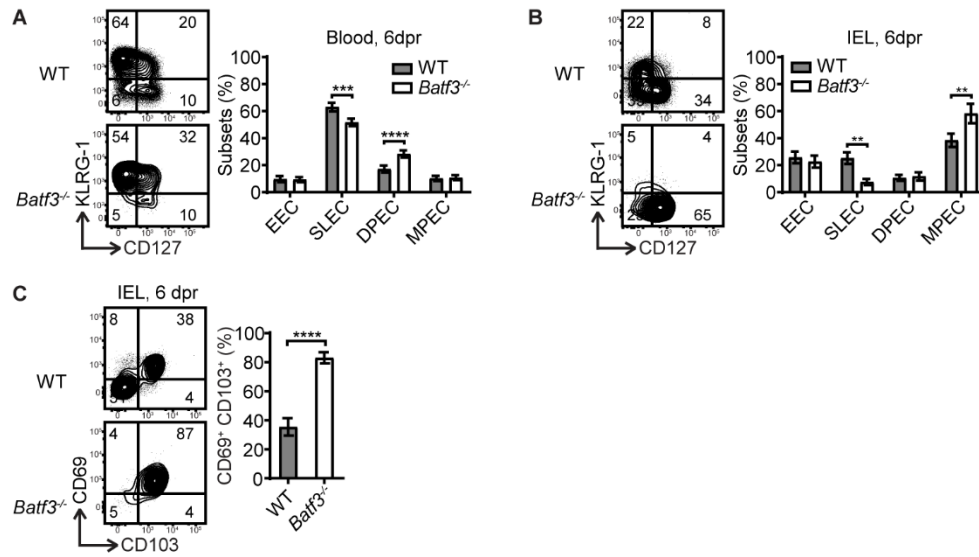

**Supplemental Figure 3.** The phenotype of WT and *Batf3*<sup>-/-</sup> OT-I cells at 6 dpr. **(A)** CD127 and KLRG-1 expression by WT and *Batf3*<sup>-/-</sup> OT-I cells in the blood. **(B)** CD127 and KLRG-1 expression by WT and *Batf3*<sup>-/-</sup> OT-I cells in the IEL compartment. **(C)** CD103 and CD69 expression by WT and *Batf3*<sup>-/-</sup> OT-I cells in the IEL compartment. The data are pooled from 2 independent experiments with n=7. The data are shown as mean ± SEM.

**Supplemental Table 1. The list of reagents for flow cytometric analysis.**

| <b>Reagent</b>                 | <b>Clone</b> | <b>Vendor</b>             |
|--------------------------------|--------------|---------------------------|
| anti-CD8 $\alpha$              | 53-6.7       | BioLegend                 |
| anti-TCR $\beta$               | H57-597      | BioLegend, Invitrogen     |
| anti-TCR V $\alpha$ 2          | B20.1        | BioLegend, eBioscience    |
| anti-CD45.1                    | A20          | BioLegend, eBioscience    |
| anti-CD45.2                    | 104          | BioLegend, eBioscience    |
| anti-CD103                     | 2E7          | BioLegend                 |
| anti-CD69                      | H1.2F3       | BioLegend                 |
| anti- $\alpha$ 4 $\beta$ 7     | DATK32       | BioLegend, BD Biosciences |
| anti-CCR9                      | CW-1.2       | BioLegend, eBioscience    |
| anti-IFN $\gamma$              | XMG1.2       | BioLegend                 |
| anti-TNF $\alpha$              | MP6-XT22     | BioLegend                 |
| anti-Granzyme B                | GB11         | BioLegend                 |
| Live/dead dye                  |              | Invitrogen                |
| Apotracker <sup>TM</sup> Green |              | BioLegend                 |
| GolgiPlug <sup>TM</sup>        |              | BD Biosciences            |
| Cytofix/Cytoperm <sup>TM</sup> |              | BD Biosciences            |
| SIINFEKL peptide               |              | Invitrogen                |
